# Supplementary material for: Modeling the Structure of Crystalline Alamethicin and Its NMR Chemical Shift Tensors
Source: MDPI journal article supplement (doi:10.3390/antibiotics10101265), 2021-10-18

Supporting Materials to “Modeling the Structure of Crystalline Alamethicin and Its NMR  
Chemical Shift Tensors” by Czernek & Brus (*Antibiotics* **2021**)

Table S1. Raw data used to describe the relationship between the  $^{13}\text{C}$  chemical shifts and shieldings of carbonyl carbons in three small compounds.

| compound                                 | tensor component | $\delta_{ii}$ (in ppm) | $\sigma_{ii}$ (in ppm) |
|------------------------------------------|------------------|------------------------|------------------------|
| glycylglycine (G2)                       | least shielded   | 242.3                  | −68.3154               |
|                                          | mid shielded     | 173.8                  | −2.8681                |
|                                          | most shielded    | 88.2                   | 85.0480                |
| G2 * $\text{HNO}_3$                      | least shielded   | 248.1                  | −73.2241               |
|                                          | mid shielded     | 167.8                  | 3.4246                 |
|                                          | most shielded    | 89.1                   | 84.6969                |
| G2 * $\text{HCl}$ * $\text{H}_2\text{O}$ | least shielded   | 242.1                  | −73.0879               |
|                                          | mid shielded     | 177.1                  | −5.1053                |
|                                          | most shielded    | 87.9                   | 85.7582                |

Figure S1. Plot of the relationship between the  $^{13}\text{C}$  chemical shifts and shieldings data of carbonyl carbons from Table S1.

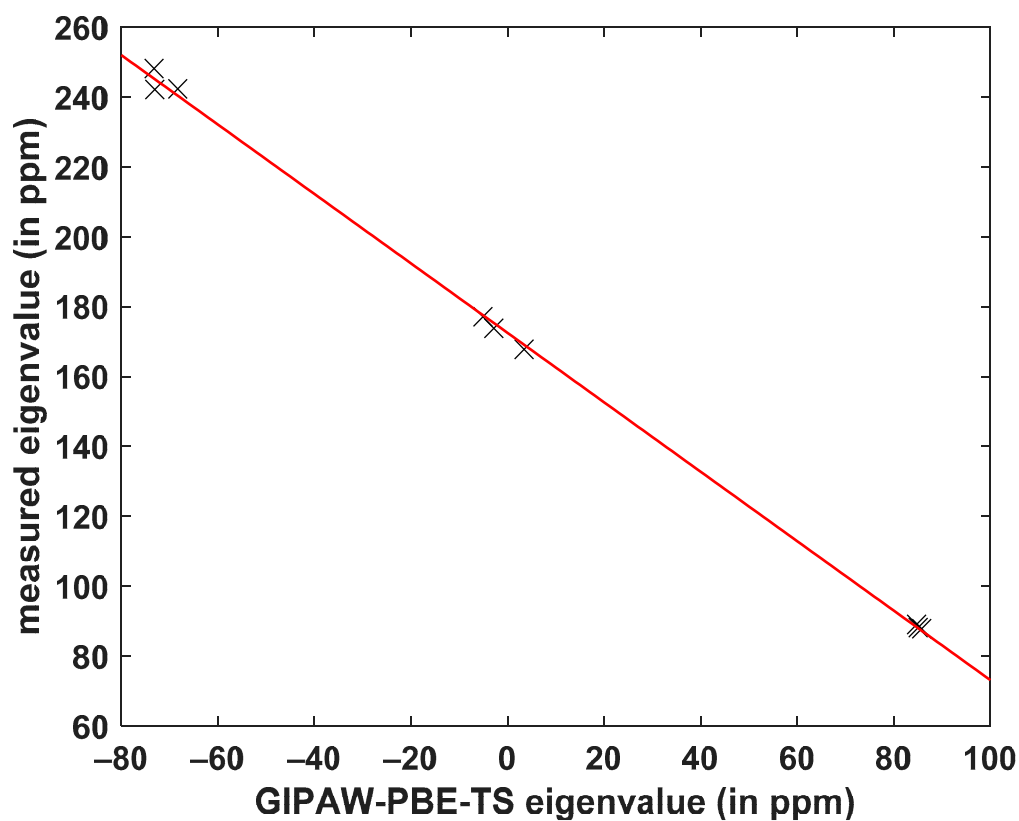

Supplement: s1 [file s1]
