# Supplementary material for: Modeling the Structure of Crystalline Alamethicin and Its NMR Chemical Shift Tensors
Source: Antibiotics (Basel). 2021 Oct 18;10(10):1265. doi: 10.3390/antibiotics10101265 (PMC8532780; doi:10.3390/antibiotics10101265)
Supplement: Supplementary file 1 [file antibiotics-10-01265-s001.zip › alm.cif]

data_struct1
_audit_creation_date              2021-10-04
_audit_creation_method            'Materials Studio'
_symmetry_space_group_name_H-M    'P21'
_symmetry_Int_Tables_number       4
_symmetry_cell_setting            monoclinic
loop_
_symmetry_equiv_pos_as_xyz
  x,y,z
  -x,y+1/2,-z
_cell_length_a                    32.9044
_cell_length_b                    30.2341
_cell_length_c                    23.4248
_cell_angle_alpha                 90.0000
_cell_angle_beta                  119.4366
_cell_angle_gamma                 90.0000
loop_
_atom_site_label
_atom_site_type_symbol
_atom_site_fract_x
_atom_site_fract_y
_atom_site_fract_z
_atom_site_U_iso_or_equiv
_atom_site_adp_type
_atom_site_occupancy
C1     C     1.52692   0.20345   0.31826   4.29000  Uiso   1.00
O2     O     1.49328   0.19394   0.32672   5.33000  Uiso   1.00
C3     C     1.56784   0.17246   0.33901   7.21000  Uiso   1.00
N4     N     1.52900   0.24151   0.28983   2.90000  Uiso   1.00
C5     C     1.49230   0.27521   0.26729   2.62000  Uiso   1.00
C6     C     1.44357   0.25376   0.22473   6.28000  Uiso   1.00
O7     O     1.40994   0.26515   0.23177   4.08000  Uiso   1.00
C8     C     1.50044   0.30992   0.22586   5.74000  Uiso   1.00
C9     C     1.49418   0.29821   0.32702   5.38000  Uiso   1.00
N10    N     1.43757   0.22335   0.17826   3.48000  Uiso   1.00
C11    C     1.39026   0.20565   0.13704   2.62000  Uiso   1.00
C12    C     1.37163   0.17850   0.17424   4.66000  Uiso   1.00
O13    O     1.32901   0.17765   0.15450   3.73000  Uiso   1.00
C14    C     1.39399   0.17751   0.08472   5.21000  Uiso   1.00
C15    C     1.43706   0.19599   0.08401   5.46000  Uiso   1.00
C16    C     1.46987   0.20757   0.15570   6.79000  Uiso   1.00
N17    N     1.40343   0.15425   0.22556   5.20000  Uiso   1.00
C18    C     1.39112   0.12709   0.26710   4.17000  Uiso   1.00
C19    C     1.36811   0.15758   0.29659   6.30000  Uiso   1.00
O20    O     1.33121   0.14748   0.29534   6.13000  Uiso   1.00
C21    C     1.43614   0.10725   0.32322   6.10000  Uiso   1.00
C22    C     1.35797   0.08958   0.22736   6.77000  Uiso   1.00
N23    N     1.39160   0.19535   0.32480   3.62000  Uiso   1.00
C24    C     1.37401   0.22654   0.35490   2.00000  Uiso   1.00
C25    C     1.32773   0.24822   0.30449   2.76000  Uiso   1.00
O26    O     1.29586   0.25306   0.31794   3.11000  Uiso   1.00
C27    C     1.41076   0.26159   0.39401   4.56000  Uiso   1.00
N28    N     1.32452   0.26143   0.24733   2.81000  Uiso   1.00
C29    C     1.28175   0.28112   0.19389   2.70000  Uiso   1.00
C30    C     1.24010   0.24919   0.17693   2.58000  Uiso   1.00
O31    O     1.20255   0.26187   0.17157   2.68000  Uiso   1.00
C32    C     1.28818   0.28532   0.13337   3.70000  Uiso   1.00
C33    C     1.27245   0.32679   0.21344   4.48000  Uiso   1.00
N34    N     1.24739   0.20661   0.16613   3.21000  Uiso   1.00
C35    C     1.21073   0.17386   0.14735   2.00000  Uiso   1.00
C36    C     1.19945   0.16420   0.20245   4.52000  Uiso   1.00
O37    O     1.15843   0.15697   0.18886   4.19000  Uiso   1.00
C38    C     1.22319   0.13107   0.12469   8.32000  Uiso   1.00
N39    N     1.23573   0.16349   0.26397   2.40000  Uiso   1.00
C40    C     1.22932   0.15645   0.32040   3.77000  Uiso   1.00
C41    C     1.19884   0.19265   0.32674   4.71000  Uiso   1.00
O42    O     1.16805   0.18206   0.34037   3.57000  Uiso   1.00
C43    C     1.27738   0.15347   0.38220   6.83000  Uiso   1.00
C44    C     1.27512   0.14544   0.44478   7.10000  Uiso   1.00
C45    C     1.32371   0.14571   0.50515   6.47000  Uiso   1.00
O46    O     1.35765   0.16357   0.50620   9.68000  Uiso   1.00
N47    N     1.32668   0.12516   0.55890  11.63000  Uiso   1.00
N48    N     1.20825   0.23468   0.31804   3.20000  Uiso   1.00
C49    C     1.18148   0.27291   0.32061   2.00000  Uiso   1.00
C50    C     1.12893   0.26637   0.26961   3.59000  Uiso   1.00
O51    O     1.09758   0.27417   0.28282   4.56000  Uiso   1.00
C52    C     1.19912   0.31429   0.30133   5.36000  Uiso   1.00
C53    C     1.18740   0.27870   0.38932   4.30000  Uiso   1.00
N54    N     1.11978   0.25278   0.20924   2.44000  Uiso   1.00
C55    C     1.07199   0.24464   0.15794   3.38000  Uiso   1.00
C56    C     1.04986   0.20600   0.17612   5.27000  Uiso   1.00
O57    O     1.01105   0.21044   0.17256   7.57000  Uiso   1.00
C58    C     1.07000   0.23798   0.09116   5.76000  Uiso   1.00
C59    C     1.02162   0.22251   0.03833   5.54000  Uiso   1.00
C60    C     1.08429   0.28050   0.06987   4.95000  Uiso   1.00
N61    N     1.07487   0.16825   0.19584   4.02000  Uiso   1.00
C62    C     1.05865   0.12898   0.21568   2.46000  Uiso   1.00
C63    C     1.04542   0.14211   0.26868   3.84000  Uiso   1.00
O64    O     1.01026   0.12702   0.26857   7.89000  Uiso   1.00
C65    C     1.09904   0.09552   0.24666   7.58000  Uiso   1.00
C66    C     1.01671   0.10819   0.15624   6.27000  Uiso   1.00
N67    N     1.07566   0.16980   0.31578   4.57000  Uiso   1.00
C68    C     1.06962   0.18337   0.37031   4.40000  Uiso   1.00
C69    C     1.02701   0.21240   0.35327   7.43000  Uiso   1.00
O70    O     1.01243   0.21624   0.39274   6.14000  Uiso   1.00
N71    N     1.00730   0.23250   0.29399   6.06000  Uiso   1.00
C72    C     0.96532   0.25875   0.26985   5.54000  Uiso   1.00
C73    C     0.92071   0.23256   0.22572   6.00000  Uiso   1.00
O74    O     0.88204   0.24819   0.21369   5.88000  Uiso   1.00
C75    C     0.96828   0.30181   0.23674   5.79000  Uiso   1.00
C76    C     0.98795   0.34175   0.28332  14.89000  Uiso   1.00
C77    C     1.03560   0.33307   0.34397  10.85000  Uiso   1.00
C78    C     0.99008   0.38214   0.24535  14.19000  Uiso   1.00
N79    N     0.92494   0.19275   0.20370   4.59000  Uiso   1.00
C80    C     0.88448   0.16409   0.16501   2.95000  Uiso   1.00
C81    C     0.85493   0.15897   0.19991   4.47000  Uiso   1.00
O82    O     0.81148   0.15930   0.16745   5.50000  Uiso   1.00
C83    C     0.90078   0.11790   0.15731   7.44000  Uiso   1.00
C84    C     0.85477   0.18419   0.09647   6.91000  Uiso   1.00
N85    N     0.87700   0.15290   0.26607   5.96000  Uiso   1.00
C86    C     0.84813   0.14754   0.29753   5.80000  Uiso   1.00
C87    C     0.82114   0.18886   0.29661   5.41000  Uiso   1.00
O88    O     0.78678   0.18493   0.30494   5.23000  Uiso   1.00
C89    C     0.88284   0.13284   0.36845   7.92000  Uiso   1.00
C90    C     0.92428   0.11437   0.36339  10.01000  Uiso   1.00
C91    C     0.92681   0.14540   0.31387   7.81000  Uiso   1.00
N92    N     0.83734   0.22825   0.28941   2.00000  Uiso   1.00
C93    C     0.81199   0.26910   0.28343   3.47000  Uiso   1.00
C94    C     0.76560   0.26972   0.21827   6.61000  Uiso   1.00
O95    O     0.72839   0.27881   0.21692   5.09000  Uiso   1.00
C96    C     0.84278   0.30999   0.29233   5.15000  Uiso   1.00
C97    C     0.81464   0.35277   0.27960   6.25000  Uiso   1.00
C98    C     0.88618   0.31006   0.36053   7.20000  Uiso   1.00
N99    N     0.76824   0.25901   0.16399   5.92000  Uiso   1.00
C100   C     0.72634   0.25465   0.09927   4.10000  Uiso   1.00
C101   C     0.69200   0.22180   0.10508   2.29000  Uiso   1.00
O102   O     0.65016   0.23078   0.08289   5.49000  Uiso   1.00
C103   C     0.74024   0.23504   0.05082   6.35000  Uiso   1.00
C104   C     0.70325   0.29981   0.07471   5.46000  Uiso   1.00
N105   N     0.71115   0.18271   0.13441   4.43000  Uiso   1.00
C106   C     0.68377   0.14701   0.14182   3.49000  Uiso   1.00
C107   C     0.65936   0.16457   0.17979   4.36000  Uiso   1.00
O108   O     0.61851   0.15502   0.16396   6.88000  Uiso   1.00
C109   C     0.71741   0.10988   0.18310   9.79000  Uiso   1.00
C110   C     0.64772   0.12875   0.07470   6.62000  Uiso   1.00
N111   N     0.68603   0.18958   0.23317   3.49000  Uiso   1.00
C112   C     0.66675   0.20766   0.27216   5.47000  Uiso   1.00
C113   C     0.62568   0.23891   0.23254   4.34000  Uiso   1.00
O114   O     0.59248   0.24032   0.24401   6.22000  Uiso   1.00
C115   C     0.70546   0.23091   0.33326   5.02000  Uiso   1.00
C116   C     0.68906   0.24986   0.37912  10.35000  Uiso   1.00
C117   C     0.66553   0.29455   0.35840  13.02000  Uiso   1.00
O118   O     0.67256   0.32198   0.32627  17.61000  Uiso   1.00
O119   O     0.63589   0.30205   0.38250  13.75000  Uiso   1.00
N120   N     0.62800   0.26535   0.18818   2.00000  Uiso   1.00
C121   C     0.59102   0.29705   0.15205   3.08000  Uiso   1.00
C122   C     0.54641   0.27726   0.09536   4.01000  Uiso   1.00
O123   O     0.50814   0.29389   0.08189   7.36000  Uiso   1.00
C124   C     0.60801   0.33574   0.12654   5.24000  Uiso   1.00
C125   C     0.63396   0.37155   0.17781   5.59000  Uiso   1.00
C126   C     0.60529   0.40266   0.19550   3.61000  Uiso   1.00
O127   O     0.62373   0.43487   0.23144   8.49000  Uiso   1.00
N128   N     0.55876   0.39396   0.17014   6.26000  Uiso   1.00
N129   N     0.55217   0.24377   0.06207   3.52000  Uiso   1.00
C130   C     0.51298   0.22160   0.00776   2.36000  Uiso   1.00
C131   C     0.52185   0.17155   0.01096   5.10000  Uiso   1.00
O132   O     0.52562   0.15165   0.06813   8.07000  Uiso   1.00
C133   C     0.49992   0.24249  -0.05966   6.86000  Uiso   1.00
C134   C     0.53903   0.24746  -0.07527   5.23000  Uiso   1.00
C135   C     0.55461   0.21187  -0.09792   6.40000  Uiso   1.00
C136   C     0.56079   0.28862  -0.06772   3.99000  Uiso   1.00
C137   C     0.59074   0.21713  -0.11229  11.32000  Uiso   1.00
C138   C     0.59643   0.29423  -0.08308   9.32000  Uiso   1.00
C139   C     0.61169   0.25842  -0.10521   5.18000  Uiso   1.00
H140   H     1.58793   0.18011   0.31427   0.00000  Uiso   1.00
H141   H     1.55505   0.13830   0.32843   0.00000  Uiso   1.00
H142   H     1.59080   0.17519   0.39230   0.00000  Uiso   1.00
H143   H     1.55552   0.24526   0.27890   0.00000  Uiso   1.00
H144   H     1.49977   0.29644   0.18196   0.00000  Uiso   1.00
H145   H     1.53443   0.32598   0.25567   0.00000  Uiso   1.00
H146   H     1.47332   0.33541   0.21015   0.00000  Uiso   1.00
H147   H     1.48985   0.27434   0.35879   0.00000  Uiso   1.00
H148   H     1.46687   0.32343   0.31172   0.00000  Uiso   1.00
H149   H     1.52845   0.31410   0.35527   0.00000  Uiso   1.00
H150   H     1.36561   0.23325   0.11481   0.00000  Uiso   1.00
H151   H     1.36189   0.17952   0.03727   0.00000  Uiso   1.00
H152   H     1.39947   0.14254   0.09969   0.00000  Uiso   1.00
H153   H     1.42842   0.22627   0.05422   0.00000  Uiso   1.00
H154   H     1.45344   0.17242   0.06595   0.00000  Uiso   1.00
H155   H     1.48897   0.17801   0.18363   0.00000  Uiso   1.00
H156   H     1.49570   0.23252   0.16178   0.00000  Uiso   1.00
H157   H     1.43773   0.16327   0.24559   0.00000  Uiso   1.00
H158   H     1.45125   0.08359   0.30317   0.00000  Uiso   1.00
H159   H     1.42779   0.08933   0.35692   0.00000  Uiso   1.00
H160   H     1.46240   0.13263   0.35067   0.00000  Uiso   1.00
H161   H     1.37575   0.06781   0.20909   0.00000  Uiso   1.00
H162   H     1.32606   0.10232   0.18575   0.00000  Uiso   1.00
H163   H     1.34837   0.07023   0.25854   0.00000  Uiso   1.00
H164   H     1.42144   0.20280   0.32354   0.00000  Uiso   1.00
H165   H     1.36511   0.20813   0.38776   0.00000  Uiso   1.00
H166   H     1.41976   0.28101   0.36216   0.00000  Uiso   1.00
H167   H     1.44256   0.24596   0.43267   0.00000  Uiso   1.00
H168   H     1.39722   0.28414   0.41741   0.00000  Uiso   1.00
H169   H     1.35276   0.25789   0.24023   0.00000  Uiso   1.00
H170   H     1.25627   0.29892   0.09224   0.00000  Uiso   1.00
H171   H     1.29562   0.25321   0.11866   0.00000  Uiso   1.00
H172   H     1.31724   0.30790   0.14401   0.00000  Uiso   1.00
H173   H     1.27091   0.32507   0.25901   0.00000  Uiso   1.00
H174   H     1.23918   0.34009   0.17490   0.00000  Uiso   1.00
H175   H     1.30069   0.34938   0.22045   0.00000  Uiso   1.00
H176   H     1.27835   0.19719   0.16910   0.00000  Uiso   1.00
H177   H     1.17802   0.18759   0.10756   0.00000  Uiso   1.00
H178   H     1.22926   0.13744   0.08332   0.00000  Uiso   1.00
H179   H     1.19442   0.10734   0.10904   0.00000  Uiso   1.00
H180   H     1.25485   0.11617   0.16465   0.00000  Uiso   1.00
H181   H     1.26923   0.16663   0.27202   0.00000  Uiso   1.00
H182   H     1.20943   0.12573   0.31356   0.00000  Uiso   1.00
H183   H     1.29671   0.18421   0.38737   0.00000  Uiso   1.00
H184   H     1.29729   0.12691   0.37504   0.00000  Uiso   1.00
H185   H     1.25715   0.11411   0.44223   0.00000  Uiso   1.00
H186   H     1.25461   0.17159   0.45190   0.00000  Uiso   1.00
H187   H     1.35777   0.12528   0.60133   0.00000  Uiso   1.00
H188   H     1.29897   0.10974   0.55832   0.00000  Uiso   1.00
H189   H     1.23561   0.24069   0.30963   0.00000  Uiso   1.00
H190   H     1.19749   0.31005   0.25371   0.00000  Uiso   1.00
H191   H     1.23551   0.32108   0.33845   0.00000  Uiso   1.00
H192   H     1.17774   0.34292   0.29864   0.00000  Uiso   1.00
H193   H     1.17578   0.24918   0.40435   0.00000  Uiso   1.00
H194   H     1.16665   0.30691   0.38994   0.00000  Uiso   1.00
H195   H     1.22438   0.28473   0.42447   0.00000  Uiso   1.00
H196   H     1.14654   0.24692   0.19980   0.00000  Uiso   1.00
H197   H     1.05041   0.27338   0.15496   0.00000  Uiso   1.00
H198   H     1.09541   0.21177   0.09811   0.00000  Uiso   1.00
H199   H     1.01139   0.19099   0.05103   0.00000  Uiso   1.00
H200   H     1.02129   0.21782  -0.00847   0.00000  Uiso   1.00
H201   H     0.99459   0.24709   0.03028   0.00000  Uiso   1.00
H202   H     1.08446   0.27507   0.02354   0.00000  Uiso   1.00
H203   H     1.11937   0.29172   0.10616   0.00000  Uiso   1.00
H204   H     1.05936   0.30735   0.06170   0.00000  Uiso   1.00
H205   H     1.10668   0.16639   0.19744   0.00000  Uiso   1.00
H206   H     1.10923   0.08509   0.21052   0.00000  Uiso   1.00
H207   H     1.08771   0.06625   0.26285   0.00000  Uiso   1.00
H208   H     1.12968   0.10990   0.28893   0.00000  Uiso   1.00
H209   H     1.00318   0.08004   0.17135   0.00000  Uiso   1.00
H210   H     1.02771   0.09667   0.12143   0.00000  Uiso   1.00
H211   H     0.98866   0.13252   0.13174   0.00000  Uiso   1.00
H212   H     1.10576   0.17931   0.31614   0.00000  Uiso   1.00
H213   H     1.10091   0.20196   0.40458   0.00000  Uiso   1.00
H214   H     1.06636   0.15467   0.39668   0.00000  Uiso   1.00
H215   H     1.02235   0.22930   0.26483   0.00000  Uiso   1.00
H216   H     0.96146   0.26695   0.31284   0.00000  Uiso   1.00
H217   H     0.93301   0.31026   0.19738   0.00000  Uiso   1.00
H218   H     0.98953   0.29514   0.21310   0.00000  Uiso   1.00
H219   H     0.96272   0.34910   0.30041   0.00000  Uiso   1.00
H220   H     1.03371   0.30773   0.37623   0.00000  Uiso   1.00
H221   H     1.04873   0.36346   0.37330   0.00000  Uiso   1.00
H222   H     1.06136   0.32207   0.32999   0.00000  Uiso   1.00
H223   H     0.95627   0.38868   0.20143   0.00000  Uiso   1.00
H224   H     1.01606   0.37717   0.22926   0.00000  Uiso   1.00
H225   H     1.00014   0.41201   0.27607   0.00000  Uiso   1.00
H226   H     0.95763   0.18106   0.21671   0.00000  Uiso   1.00
H227   H     0.87011   0.09648   0.13156   0.00000  Uiso   1.00
H228   H     0.92542   0.10255   0.20404   0.00000  Uiso   1.00
H229   H     0.91819   0.12016   0.12773   0.00000  Uiso   1.00
H230   H     0.82381   0.16386   0.06698   0.00000  Uiso   1.00
H231   H     0.87612   0.18549   0.07230   0.00000  Uiso   1.00
H232   H     0.84359   0.21781   0.09944   0.00000  Uiso   1.00
H233   H     0.82157   0.12203   0.27132   0.00000  Uiso   1.00
H234   H     0.86667   0.10908   0.38651   0.00000  Uiso   1.00
H235   H     0.89388   0.16164   0.40138   0.00000  Uiso   1.00
H236   H     0.91735   0.08028   0.34440   0.00000  Uiso   1.00
H237   H     0.95691   0.11438   0.41044   0.00000  Uiso   1.00
H238   H     0.94379   0.17666   0.33798   0.00000  Uiso   1.00
H239   H     0.94636   0.13180   0.29139   0.00000  Uiso   1.00
H240   H     0.86130   0.22911   0.27329   0.00000  Uiso   1.00
H241   H     0.80153   0.26902   0.32140   0.00000  Uiso   1.00
H242   H     0.85460   0.30740   0.25581   0.00000  Uiso   1.00
H243   H     0.80031   0.35606   0.31310   0.00000  Uiso   1.00
H244   H     0.78516   0.35437   0.22932   0.00000  Uiso   1.00
H245   H     0.83703   0.38159   0.28689   0.00000  Uiso   1.00
H246   H     0.90909   0.33791   0.36522   0.00000  Uiso   1.00
H247   H     0.90679   0.27961   0.37038   0.00000  Uiso   1.00
H248   H     0.87655   0.31361   0.39917   0.00000  Uiso   1.00
H249   H     0.79986   0.25029   0.16895   0.00000  Uiso   1.00
H250   H     0.70874   0.23001   0.00319   0.00000  Uiso   1.00
H251   H     0.75838   0.20330   0.06801   0.00000  Uiso   1.00
H252   H     0.76323   0.25810   0.04372   0.00000  Uiso   1.00
H253   H     0.69718   0.31622   0.11152   0.00000  Uiso   1.00
H254   H     0.66974   0.29589   0.02971   0.00000  Uiso   1.00
H255   H     0.72633   0.32068   0.06458   0.00000  Uiso   1.00
H256   H     0.74576   0.17672   0.15011   0.00000  Uiso   1.00
H257   H     0.73626   0.09722   0.15864   0.00000  Uiso   1.00
H258   H     0.69735   0.08262   0.18812   0.00000  Uiso   1.00
H259   H     0.74288   0.12153   0.23229   0.00000  Uiso   1.00
H260   H     0.66594   0.11149   0.05252   0.00000  Uiso   1.00
H261   H     0.62677   0.15552   0.04182   0.00000  Uiso   1.00
H262   H     0.62420   0.10538   0.07985   0.00000  Uiso   1.00
H263   H     0.72099   0.19411   0.24942   0.00000  Uiso   1.00
H264   H     0.65155   0.18063   0.28724   0.00000  Uiso   1.00
H265   H     0.72053   0.25751   0.31742   0.00000  Uiso   1.00
H266   H     0.73330   0.20661   0.35998   0.00000  Uiso   1.00
H267   H     0.71960   0.25512   0.42809   0.00000  Uiso   1.00
H268   H     0.66600   0.22711   0.38651   0.00000  Uiso   1.00
H269   H     0.62418   0.33221   0.36906   0.00000  Uiso   1.00
H270   H     0.65720   0.26499   0.18307   0.00000  Uiso   1.00
H271   H     0.57969   0.30922   0.18622   0.00000  Uiso   1.00
H272   H     0.57764   0.35009   0.08346   0.00000  Uiso   1.00
H273   H     0.63035   0.32223   0.10801   0.00000  Uiso   1.00
H274   H     0.65321   0.39327   0.16168   0.00000  Uiso   1.00
H275   H     0.66064   0.35676   0.22418   0.00000  Uiso   1.00
H276   H     0.54136   0.36810   0.14020   0.00000  Uiso   1.00
H277   H     0.54013   0.41588   0.18096   0.00000  Uiso   1.00
H278   H     0.58545   0.23440   0.07448   0.00000  Uiso   1.00
H279   H     0.48296   0.22714   0.01534   0.00000  Uiso   1.00
H280   H     0.55310   0.16468   0.00652   0.00000  Uiso   1.00
H281   H     0.49189   0.15620  -0.03167   0.00000  Uiso   1.00
H282   H     0.55864   0.15222   0.10272   0.00000  Uiso   1.00
H283   H     0.48502   0.27527  -0.06096   0.00000  Uiso   1.00
H284   H     0.47158   0.22241  -0.09772   0.00000  Uiso   1.00
H285   H     0.53786   0.17959  -0.10518   0.00000  Uiso   1.00
H286   H     0.54922   0.31675  -0.05016   0.00000  Uiso   1.00
H287   H     0.60225   0.18893  -0.12984   0.00000  Uiso   1.00
H288   H     0.61231   0.32675  -0.07780   0.00000  Uiso   1.00
H289   H     0.63957   0.26275  -0.11722   0.00000  Uiso   1.00
loop_
_geom_bond_atom_site_label_1
_geom_bond_atom_site_label_2
_geom_bond_distance
_geom_bond_site_symmetry_2
_ccdc_geom_bond_type
C1     O2      1.250   .     D
C1     C3      1.511   .     S
C1     N4      1.348   .     S
C3     H140    1.096   .     S
C3     H141    1.097   .     S
C3     H142    1.100   .     S
N4     C5      1.466   .     S
N4     H143    1.029   .     S
C5     C6      1.554   .     S
C5     C8      1.540   .     S
C5     C9      1.536   .     S
C6     O7      1.245   .     D
C6     N10     1.363   .     S
C8     H144    1.096   .     S
C8     H145    1.098   .     S
C8     H146    1.097   .     S
C9     H147    1.095   .     S
C9     H148    1.096   .     S
C9     H149    1.099   .     S
N10    C11     1.471   .     S
N10    C16     1.479   .     S
C11    C14     1.546   .     S
C11    C12     1.528   .     S
C11    H150    1.100   .     S
C12    N17     1.357   .     S
C12    O13     1.243   .     D
C14    C15     1.531   .     S
C14    H151    1.096   .     S
C14    H152    1.101   .     S
C15    C16     1.525   .     S
C15    H153    1.101   .     S
C15    H154    1.096   .     S
C16    H155    1.103   .     S
C16    H156    1.092   .     S
N17    C18     1.474   .     S
N17    H157    1.023   .     S
C18    C19     1.554   .     S
C18    C21     1.539   .     S
C18    C22     1.531   .     S
C19    O20     1.238   .     D
C19    N23     1.355   .     S
C21    H158    1.100   .     S
C21    H159    1.098   .     S
C21    H160    1.097   .     S
C22    H161    1.098   .     S
C22    H162    1.093   .     S
C22    H163    1.097   .     S
N23    C24     1.457   .     S
N23    H164    1.022   .     S
C24    C27     1.528   .     S
C24    C25     1.541   .     S
C24    H165    1.100   .     S
C25    O26     1.243   .     D
C25    N28     1.351   .     S
C27    H166    1.098   .     S
C27    H167    1.099   .     S
C27    H168    1.097   .     S
N28    C29     1.473   .     S
N28    H169    1.027   .     S
C29    C30     1.560   .     S
C29    C32     1.538   .     S
C29    C33     1.532   .     S
C30    O31     1.240   .     D
C30    N34     1.356   .     S
C32    H170    1.098   .     S
C32    H171    1.097   .     S
C32    H172    1.099   .     S
C33    H173    1.094   .     S
C33    H174    1.097   .     S
C33    H175    1.099   .     S
N34    C35     1.452   .     S
N34    H176    1.027   .     S
C35    C38     1.529   .     S
C35    C36     1.536   .     S
C35    H177    1.101   .     S
C36    N39     1.346   .     S
C36    O37     1.244   .     D
C38    H178    1.098   .     S
C38    H179    1.097   .     S
C38    H180    1.098   .     S
N39    C40     1.453   .     S
N39    H181    1.027   .     S
C40    C41     1.540   .     S
C40    C43     1.534   .     S
C40    H182    1.102   .     S
C41    O42     1.245   .     D
C41    N48     1.347   .     S
C43    C44     1.523   .     S
C43    H183    1.099   .     S
C43    H184    1.100   .     S
C44    C45     1.528   .     S
C44    H185    1.103   .     S
C44    H186    1.104   .     S
C45    O46     1.230   .     D
C45    N47     1.364   .     S
N47    H187    1.017   .     S
N47    H188    1.018   .     S
N48    C49     1.472   .     S
N48    H189    1.028   .     S
C49    C50     1.557   .     S
C49    C52     1.537   .     S
C49    C53     1.533   .     S
C50    O51     1.237   .     D
C50    N54     1.357   .     S
C52    H190    1.097   .     S
C52    H191    1.099   .     S
C52    H192    1.098   .     S
C53    H193    1.095   .     S
C53    H194    1.097   .     S
C53    H195    1.099   .     S
N54    C55     1.456   .     S
N54    H196    1.023   .     S
C55    C56     1.543   .     S
C55    C58     1.546   .     S
C55    H197    1.103   .     S
C56    O57     1.245   .     D
C56    N61     1.349   .     S
C58    C59     1.532   .     S
C58    C60     1.534   .     S
C58    H198    1.105   .     S
C59    H199    1.099   .     S
C59    H200    1.100   .     S
C59    H201    1.102   .     S
C60    H202    1.100   .     S
C60    H203    1.098   .     S
C60    H204    1.102   .     S
N61    C62     1.468   .     S
N61    H205    1.031   .     S
C62    C63     1.556   .     S
C62    C65     1.539   .     S
C62    C66     1.533   .     S
C63    O64     1.242   .     D
C63    N67     1.352   .     S
C65    H206    1.099   .     S
C65    H207    1.098   .     S
C65    H208    1.097   .     S
C66    H209    1.097   .     S
C66    H210    1.099   .     S
C66    H211    1.096   .     S
N67    C68     1.445   .     S
N67    H212    1.027   .     S
C68    C69     1.532   .     S
C68    H213    1.099   .     S
C68    H214    1.100   .     S
C69    N71     1.354   .     S
C69    O70     1.239   .     D
N71    C72     1.445   .     S
N71    H215    1.027   .     S
C72    C75     1.543   .     S
C72    C73     1.536   .     S
C72    H216    1.104   .     S
C73    N79     1.343   .     S
C73    O74     1.253   .     D
C75    C76     1.541   .     S
C75    H217    1.100   .     S
C75    H218    1.103   .     S
C76    C78     1.532   .     S
C76    C77     1.535   .     S
C76    H219    1.107   .     S
C77    H220    1.099   .     S
C77    H221    1.100   .     S
C77    H222    1.100   .     S
C78    H223    1.100   .     S
C78    H224    1.101   .     S
C78    H225    1.100   .     S
N79    C80     1.469   .     S
N79    H226    1.026   .     S
C80    C81     1.555   .     S
C80    C83     1.538   .     S
C80    C84     1.536   .     S
C81    O82     1.247   .     D
C81    N85     1.363   .     S
C83    H227    1.097   .     S
C83    H228    1.095   .     S
C83    H229    1.097   .     S
C84    H230    1.096   .     S
C84    H231    1.098   .     S
C84    H232    1.095   .     S
N85    C86     1.470   .     S
N85    C91     1.479   .     S
C86    C87     1.527   .     S
C86    C89     1.548   .     S
C86    H233    1.099   .     S
C87    N92     1.349   .     S
C87    O88     1.244   .     D
C89    C90     1.531   .     S
C89    H234    1.095   .     S
C89    H235    1.100   .     S
C90    C91     1.526   .     S
C90    H236    1.101   .     S
C90    H237    1.097   .     S
C91    H238    1.102   .     S
C91    H239    1.092   .     S
N92    C93     1.458   .     S
N92    H240    1.028   .     S
C93    C96     1.546   .     S
C93    C94     1.539   .     S
C93    H241    1.100   .     S
C94    O95     1.240   .     D
C94    N99     1.356   .     S
C96    C97     1.532   .     S
C96    C98     1.533   .     S
C96    H242    1.103   .     S
C97    H243    1.101   .     S
C97    H244    1.099   .     S
C97    H245    1.099   .     S
C98    H246    1.099   .     S
C98    H247    1.099   .     S
C98    H248    1.101   .     S
N99    C100    1.470   .     S
N99    H249    1.023   .     S
C100   C101    1.560   .     S
C100   C103    1.536   .     S
C100   C104    1.531   .     S
C101   O102    1.239   .     D
C101   N105    1.357   .     S
C103   H250    1.098   .     S
C103   H251    1.097   .     S
C103   H252    1.100   .     S
C104   H253    1.095   .     S
C104   H254    1.095   .     S
C104   H255    1.099   .     S
N105   C106    1.470   .     S
N105   H256    1.026   .     S
C106   C107    1.556   .     S
C106   C109    1.539   .     S
C106   C110    1.533   .     S
C107   O108    1.240   .     D
C107   N111    1.352   .     S
C109   H257    1.100   .     S
C109   H258    1.098   .     S
C109   H259    1.098   .     S
C110   H260    1.099   .     S
C110   H261    1.096   .     S
C110   H262    1.097   .     S
N111   C112    1.451   .     S
N111   H263    1.028   .     S
C112   C115    1.541   .     S
C112   C113    1.532   .     S
C112   H264    1.103   .     S
C113   O114    1.247   .     D
C113   N120    1.343   .     S
C115   C116    1.531   .     S
C115   H265    1.100   .     S
C115   H266    1.099   .     S
C116   C117    1.514   .     S
C116   H267    1.104   .     S
C116   H268    1.099   .     S
C117   O119    1.365   .     S
C117   O118    1.216   .     D
O119   H269    0.980   .     S
N120   C121    1.450   .     S
N120   H270    1.025   .     S
C121   C124    1.538   .     S
C121   C122    1.536   .     S
C121   H271    1.099   .     S
C122   O123    1.244   .     D
C122   N129    1.347   .     S
C124   C125    1.528   .     S
C124   H272    1.102   .     S
C124   H273    1.100   .     S
C125   C126    1.527   .     S
C125   H274    1.100   .     S
C125   H275    1.101   .     S
C126   O127    1.234   .     D
C126   N128    1.368   .     S
N128   H276    1.018   .     S
N128   H277    1.016   .     S
N129   C130    1.455   .     S
N129   H278    1.025   .     S
C130   C133    1.553   .     S
C130   C131    1.536   .     S
C130   H279    1.099   .     S
C131   O132    1.417   .     S
C131   H280    1.103   .     S
C131   H281    1.103   .     S
O132   H282    0.986   .     S
C133   C134    1.508   .     S
C133   H283    1.099   .     S
C133   H284    1.103   .     S
C134   C136    1.403   .     S
C134   C135    1.403   .     D
C135   C137    1.395   .     S
C135   H285    1.092   .     S
C136   C138    1.396   .     D
C136   H286    1.092   .     S
C137   C139    1.396   .     D
C137   H287    1.092   .     S
C138   C139    1.396   .     S
C138   H288    1.092   .     S
C139   H289    1.092   .     S
