# Supplementary material for: Modeling the Structure of Crystalline Alamethicin and Its NMR Chemical Shift Tensors
Source: Antibiotics (Basel). 2021 Oct 18;10(10):1265. doi: 10.3390/antibiotics10101265 (PMC8532780; doi:10.3390/antibiotics10101265)
Supplement: Supplementary file 1 [file antibiotics-10-01265-s001.zip › alm.pdb]

REMARK   Materials Studio PDB file
REMARK   See “Modeling the Structure of Crystalline Alamethicin and Its NMR Chemical Shift Tensors” by Czernek & Brus (Antibiotics 2021)
CRYST1   32.923   30.256   23.452  90.00 119.43  90.00 P21
ATOM      1  C   ACE C   0      46.582   6.161   6.576  1.00  4.29           C    
ATOM      2  O   ACE C   0      45.373   5.878   6.740  1.00  5.33           O    
ATOM      3  CH3 ACE C   0      47.680   5.220   7.013  1.00  7.21           C    
ATOM      4  H1  ACE C   0      48.632   5.439   6.516  1.00  0.00           H    
ATOM      5  H2  ACE C   0      47.373   4.188   6.802  1.00  0.00           H    
ATOM      6  H3  ACE C   0      47.812   5.310   8.102  1.00  0.00           H    
ATOM      7  N   AIB C   1      46.985   7.310   5.998  1.00  2.90           N    
ATOM      8  CA  AIB C   1      46.041   8.333   5.535  1.00  2.62           C    
ATOM      9  C   AIB C   1      44.929   7.686   4.664  1.00  6.28           C    
ATOM     10  O   AIB C   1      43.741   8.033   4.804  1.00  4.08           O    
ATOM     11  CB1 AIB C   1      46.791   9.386   4.697  1.00  5.74           C    
ATOM     12  CB2 AIB C   1      45.405   9.023   6.752  1.00  5.38           C    
ATOM     13  H4  AIB C   1      47.985   7.421   5.783  1.00  0.00           H    
ATOM     14  H5  AIB C   1      47.265   8.987   3.792  1.00  0.00           H    
ATOM     15  H6  AIB C   1      47.576   9.858   5.306  1.00  0.00           H    
ATOM     16  H7  AIB C   1      46.083  10.168   4.392  1.00  0.00           H    
ATOM     17  H8  AIB C   1      44.904   8.293   7.396  1.00  0.00           H    
ATOM     18  H9  AIB C   1      44.672   9.774   6.435  1.00  0.00           H    
ATOM     19  H10 AIB C   1      46.199   9.515   7.331  1.00  0.00           H    
ATOM     20  N   PRO C   2      45.266   6.763   3.721  1.00  3.48           N    
ATOM     21  CA  PRO C   2      44.186   6.222   2.881  1.00  2.62           C    
ATOM     22  C   PRO C   2      43.144   5.399   3.637  1.00  4.66           C    
ATOM     23  O   PRO C   2      41.972   5.372   3.229  1.00  3.73           O    
ATOM     24  CB  PRO C   2      44.917   5.372   1.816  1.00  5.21           C    
ATOM     25  CG  PRO C   2      46.338   5.941   1.800  1.00  5.46           C    
ATOM     26  CD  PRO C   2      46.591   6.290   3.263  1.00  6.79           C    
ATOM     27  H11 PRO C   2      43.630   7.054   2.424  1.00  0.00           H    
ATOM     28  H12 PRO C   2      44.406   5.424   0.848  1.00  0.00           H    
ATOM     29  H13 PRO C   2      44.932   4.316   2.128  1.00  0.00           H    
ATOM     30  H14 PRO C   2      46.387   6.859   1.196  1.00  0.00           H    
ATOM     31  H15 PRO C   2      47.090   5.235   1.428  1.00  0.00           H    
ATOM     32  H16 PRO C   2      46.899   5.397   3.833  1.00  0.00           H    
ATOM     33  H17 PRO C   2      47.368   7.047   3.390  1.00  0.00           H    
ATOM     34  N   AIB C   3      43.598   4.663   4.683  1.00  5.20           N    
ATOM     35  CA  AIB C   3      42.709   3.842   5.524  1.00  4.17           C    
ATOM     36  C   AIB C   3      41.614   4.765   6.125  1.00  6.30           C    
ATOM     37  O   AIB C   3      40.413   4.458   6.106  1.00  6.13           O    
ATOM     38  CB1 AIB C   3      43.536   3.238   6.673  1.00  6.10           C    
ATOM     39  CB2 AIB C   3      42.078   2.711   4.706  1.00  6.77           C    
ATOM     40  H18 AIB C   3      44.492   4.939   5.101  1.00  0.00           H    
ATOM     41  H19 AIB C   3      44.266   2.522   6.269  1.00  0.00           H    
ATOM     42  H20 AIB C   3      42.868   2.697   7.356  1.00  0.00           H    
ATOM     43  H21 AIB C   3      44.081   4.004   7.238  1.00  0.00           H    
ATOM     44  H22 AIB C   3      42.874   2.048   4.341  1.00  0.00           H    
ATOM     45  H23 AIB C   3      41.520   3.100   3.850  1.00  0.00           H    
ATOM     46  H24 AIB C   3      41.393   2.130   5.335  1.00  0.00           H    
ATOM     47  N   ALA C   4      42.063   5.908   6.698  1.00  3.62           N    
ATOM     48  CA  ALA C   4      41.138   6.848   7.315  1.00  2.00           C    
ATOM     49  C   ALA C   4      40.197   7.508   6.288  1.00  2.76           C    
ATOM     50  O   ALA C   4      38.993   7.654   6.561  1.00  3.11           O    
ATOM     51  CB  ALA C   4      41.890   7.905   8.121  1.00  4.56           C    
ATOM     52  H25 ALA C   4      43.059   6.138   6.663  1.00  0.00           H    
ATOM     53  H26 ALA C   4      40.466   6.285   7.981  1.00  0.00           H    
ATOM     54  H27 ALA C   4      42.553   8.499   7.478  1.00  0.00           H    
ATOM     55  H28 ALA C   4      42.490   7.432   8.911  1.00  0.00           H    
ATOM     56  H29 ALA C   4      41.170   8.582   8.598  1.00  0.00           H    
ATOM     57  N   AIB C   5      40.750   7.908   5.123  1.00  2.81           N    
ATOM     58  CA  AIB C   5      39.960   8.501   4.031  1.00  2.70           C    
ATOM     59  C   AIB C   5      38.786   7.534   3.683  1.00  2.58           C    
ATOM     60  O   AIB C   5      37.614   7.920   3.567  1.00  2.68           O    
ATOM     61  CB1 AIB C   5      40.870   8.633   2.798  1.00  3.70           C    
ATOM     62  CB2 AIB C   5      39.422   9.879   4.430  1.00  4.48           C    
ATOM     63  H30 AIB C   5      41.762   7.803   4.981  1.00  0.00           H    
ATOM     64  H31 AIB C   5      40.297   9.057   1.963  1.00  0.00           H    
ATOM     65  H32 AIB C   5      41.279   7.663   2.488  1.00  0.00           H    
ATOM     66  H33 AIB C   5      41.709   9.308   3.022  1.00  0.00           H    
ATOM     67  H34 AIB C   5      38.839   9.820   5.355  1.00  0.00           H    
ATOM     68  H35 AIB C   5      38.777  10.280   3.639  1.00  0.00           H    
ATOM     69  H36 AIB C   5      40.268  10.563   4.584  1.00  0.00           H    
ATOM     70  N   ALA C   6      39.148   6.245   3.469  1.00  3.21           N    
ATOM     71  CA  ALA C   6      38.159   5.255   3.084  1.00  2.00           C    
ATOM     72  C   ALA C   6      37.150   4.962   4.207  1.00  4.52           C    
ATOM     73  O   ALA C   6      35.958   4.743   3.927  1.00  4.19           O    
ATOM     74  CB  ALA C   6      38.833   3.965   2.615  1.00  8.32           C    
ATOM     75  H37 ALA C   6      40.132   5.958   3.536  1.00  0.00           H    
ATOM     76  H38 ALA C   6      37.541   5.672   2.274  1.00  0.00           H    
ATOM     77  H39 ALA C   6      39.509   4.168   1.773  1.00  0.00           H    
ATOM     78  H40 ALA C   6      38.070   3.247   2.288  1.00  0.00           H    
ATOM     79  H41 ALA C   6      39.417   3.510   3.426  1.00  0.00           H    
ATOM     80  N   GLN C   7      37.631   4.945   5.464  1.00  2.40           N    
ATOM     81  CA  GLN C   7      36.770   4.737   6.617  1.00  3.77           C    
ATOM     82  C   GLN C   7      35.695   5.834   6.742  1.00  4.71           C    
ATOM     83  O   GLN C   7      34.524   5.514   7.015  1.00  3.57           O    
ATOM     84  CB  GLN C   7      37.638   4.643   7.879  1.00  6.83           C    
ATOM     85  CG  GLN C   7      36.841   4.408   9.157  1.00  7.10           C    
ATOM     86  CD  GLN C   7      37.745   4.417  10.387  1.00  6.47           C    
ATOM     87  OE1 GLN C   7      38.846   4.968  10.409  1.00  9.68           O    
ATOM     88  NE2 GLN C   7      37.232   3.783  11.484  1.00 11.63           N    
ATOM     89  H42 GLN C   7      38.641   5.040   5.630  1.00  0.00           H    
ATOM     90  H43 GLN C   7      36.191   3.810   6.479  1.00  0.00           H    
ATOM     91  H44 GLN C   7      38.223   5.567   7.986  1.00  0.00           H    
ATOM     92  H45 GLN C   7      38.369   3.834   7.736  1.00  0.00           H    
ATOM     93  H46 GLN C   7      36.275   3.463   9.107  1.00  0.00           H    
ATOM     94  H47 GLN C   7      36.088   5.202   9.298  1.00  0.00           H    
ATOM     95  H48 GLN C   7      37.766   3.794  12.348  1.00  0.00           H    
ATOM     96  H49 GLN C   7      36.329   3.324  11.473  1.00  0.00           H    
ATOM     97  N   AIB C   8      36.104   7.106   6.568  1.00  3.20           N    
ATOM     98  CA  AIB C   8      35.189   8.258   6.617  1.00  2.00           C    
ATOM     99  C   AIB C   8      34.049   8.053   5.576  1.00  3.59           C    
ATOM    100  O   AIB C   8      32.864   8.289   5.843  1.00  4.56           O    
ATOM    101  CB1 AIB C   8      35.986   9.510   6.216  1.00  5.36           C    
ATOM    102  CB2 AIB C   8      34.593   8.437   8.018  1.00  4.30           C    
ATOM    103  H50 AIB C   8      37.103   7.291   6.407  1.00  0.00           H    
ATOM    104  H51 AIB C   8      36.465   9.385   5.236  1.00  0.00           H    
ATOM    105  H52 AIB C   8      36.768   9.712   6.962  1.00  0.00           H    
ATOM    106  H53 AIB C   8      35.313  10.376   6.175  1.00  0.00           H    
ATOM    107  H54 AIB C   8      34.026   7.550   8.324  1.00  0.00           H    
ATOM    108  H55 AIB C   8      33.913   9.297   8.034  1.00  0.00           H    
ATOM    109  H56 AIB C   8      35.407   8.608   8.736  1.00  0.00           H    
ATOM    110  N   VAL C   9      34.447   7.645   4.344  1.00  2.44           N    
ATOM    111  CA  VAL C   9      33.471   7.401   3.292  1.00  3.38           C    
ATOM    112  C   VAL C   9      32.527   6.236   3.657  1.00  5.27           C    
ATOM    113  O   VAL C   9      31.293   6.373   3.575  1.00  7.57           O    
ATOM    114  CB  VAL C   9      34.179   7.197   1.932  1.00  5.76           C    
ATOM    115  CG1 VAL C   9      33.192   6.724   0.860  1.00  5.54           C    
ATOM    116  CG2 VAL C   9      34.894   8.481   1.494  1.00  4.95           C    
ATOM    117  H57 VAL C   9      35.436   7.465   4.156  1.00  0.00           H    
ATOM    118  H58 VAL C   9      32.798   8.271   3.226  1.00  0.00           H    
ATOM    119  H59 VAL C   9      34.936   6.406   2.078  1.00  0.00           H    
ATOM    120  H60 VAL C   9      32.733   5.759   1.114  1.00  0.00           H    
ATOM    121  H61 VAL C   9      33.708   6.606  -0.104  1.00  0.00           H    
ATOM    122  H62 VAL C   9      32.378   7.452   0.718  1.00  0.00           H    
ATOM    123  H63 VAL C   9      35.416   8.318   0.540  1.00  0.00           H    
ATOM    124  H64 VAL C   9      35.643   8.812   2.224  1.00  0.00           H    
ATOM    125  H65 VAL C   9      34.169   9.297   1.342  1.00  0.00           H    
ATOM    126  N   AIB C  10      33.119   5.093   4.064  1.00  4.02           N    
ATOM    127  CA  AIB C  10      32.353   3.907   4.465  1.00  2.46           C    
ATOM    128  C   AIB C  10      31.307   4.300   5.547  1.00  3.84           C    
ATOM    129  O   AIB C  10      30.152   3.843   5.545  1.00  7.89           O    
ATOM    130  CB1 AIB C  10      33.326   2.895   5.096  1.00  7.58           C    
ATOM    131  CB2 AIB C  10      31.656   3.281   3.251  1.00  6.27           C    
ATOM    132  H66 AIB C  10      34.145   5.036   4.108  1.00  0.00           H    
ATOM    133  H67 AIB C  10      34.079   2.585   4.358  1.00  0.00           H    
ATOM    134  H68 AIB C  10      32.769   2.007   5.423  1.00  0.00           H    
ATOM    135  H69 AIB C  10      33.844   3.330   5.960  1.00  0.00           H    
ATOM    136  H70 AIB C  10      31.035   2.431   3.558  1.00  0.00           H    
ATOM    137  H71 AIB C  10      32.418   2.931   2.540  1.00  0.00           H    
ATOM    138  H72 AIB C  10      31.017   4.018   2.750  1.00  0.00           H    
ATOM    139  N   GLY C  11      31.758   5.136   6.509  1.00  4.57           N    
ATOM    140  CA  GLY C  11      30.926   5.547   7.617  1.00  4.40           C    
ATOM    141  C   GLY C  11      29.724   6.426   7.262  1.00  7.43           C    
ATOM    142  O   GLY C  11      28.780   6.534   8.057  1.00  6.14           O    
ATOM    143  H73 GLY C  11      32.744   5.426   6.520  1.00  0.00           H    
ATOM    144  H74 GLY C  11      31.557   6.104   8.324  1.00  0.00           H    
ATOM    145  H75 GLY C  11      30.508   4.678   8.149  1.00  0.00           H    
ATOM    146  N   LEU C  12      29.767   7.040   6.056  1.00  6.06           N    
ATOM    147  CA  LEU C  12      28.662   7.825   5.555  1.00  5.54           C    
ATOM    148  C   LEU C  12      27.707   7.030   4.651  1.00  6.00           C    
ATOM    149  O   LEU C  12      26.573   7.502   4.402  1.00  5.88           O    
ATOM    150  CB  LEU C  12      29.137   9.126   4.879  1.00  5.79           C    
ATOM    151  CG  LEU C  12      29.248  10.333   5.830  1.00 14.89           C    
ATOM    152  CD1 LEU C  12      30.119  10.072   7.067  1.00 10.85           C    
ATOM    153  CD2 LEU C  12      29.761  11.551   5.052  1.00 14.19           C    
ATOM    154  H76 LEU C  12      30.611   6.968   5.479  1.00  0.00           H    
ATOM    155  H77 LEU C  12      28.033   8.073   6.426  1.00  0.00           H    
ATOM    156  H78 LEU C  12      28.428   9.382   4.077  1.00  0.00           H    
ATOM    157  H79 LEU C  12      30.109   8.930   4.395  1.00  0.00           H    
ATOM    158  H80 LEU C  12      28.222  10.560   6.178  1.00  0.00           H    
ATOM    159  H81 LEU C  12      29.685   9.305   7.724  1.00  0.00           H    
ATOM    160  H82 LEU C  12      30.214  10.991   7.664  1.00  0.00           H    
ATOM    161  H83 LEU C  12      31.128   9.738   6.782  1.00  0.00           H    
ATOM    162  H84 LEU C  12      29.143  11.757   4.164  1.00  0.00           H    
ATOM    163  H85 LEU C  12      30.795  11.385   4.710  1.00  0.00           H    
ATOM    164  H86 LEU C  12      29.759  12.454   5.680  1.00  0.00           H    
ATOM    165  N   AIB C  13      28.099   5.825   4.205  1.00  4.59           N    
ATOM    166  CA  AIB C  13      27.211   4.960   3.414  1.00  2.95           C    
ATOM    167  C   AIB C  13      25.835   4.809   4.124  1.00  4.47           C    
ATOM    168  O   AIB C  13      24.780   4.822   3.460  1.00  5.50           O    
ATOM    169  CB1 AIB C  13      27.833   3.561   3.260  1.00  7.44           C    
ATOM    170  CB2 AIB C  13      27.022   5.571   2.017  1.00  6.91           C    
ATOM    171  H87 AIB C  13      29.022   5.470   4.471  1.00  0.00           H    
ATOM    172  H88 AIB C  13      27.123   2.913   2.729  1.00  0.00           H    
ATOM    173  H89 AIB C  13      28.099   3.096   4.215  1.00  0.00           H    
ATOM    174  H90 AIB C  13      28.751   3.627   2.662  1.00  0.00           H    
ATOM    175  H91 AIB C  13      26.349   4.954   1.410  1.00  0.00           H    
ATOM    176  H92 AIB C  13      28.004   5.623   1.527  1.00  0.00           H    
ATOM    177  H93 AIB C  13      26.610   6.583   2.084  1.00  0.00           H    
ATOM    178  N   PRO C  14      25.797   4.626   5.473  1.00  5.96           N    
ATOM    179  CA  PRO C  14      24.484   4.466   6.114  1.00  5.80           C    
ATOM    180  C   PRO C  14      23.606   5.714   6.094  1.00  5.41           C    
ATOM    181  O   PRO C  14      22.378   5.595   6.256  1.00  5.23           O    
ATOM    182  CB  PRO C  14      24.808   4.030   7.564  1.00  7.92           C    
ATOM    183  CG  PRO C  14      26.232   3.473   7.467  1.00 10.01           C    
ATOM    184  CD  PRO C  14      26.886   4.401   6.448  1.00  7.81           C    
ATOM    185  H94 PRO C  14      23.913   3.691   5.582  1.00  0.00           H    
ATOM    186  H95 PRO C  14      24.069   3.313   7.937  1.00  0.00           H    
ATOM    187  H96 PRO C  14      24.791   4.906   8.229  1.00  0.00           H    
ATOM    188  H97 PRO C  14      26.223   2.438   7.090  1.00  0.00           H    
ATOM    189  H98 PRO C  14      26.762   3.485   8.427  1.00  0.00           H    
ATOM    190  H99 PRO C  14      27.177   5.347   6.931  1.00  0.00           H    
ATOM    191 0H10 PRO C  14      27.783   3.980   5.987  1.00  0.00           H    
ATOM    192  N   VAL C  15      24.225   6.906   5.960  1.00  2.00           N    
ATOM    193  CA  VAL C  15      23.461   8.142   5.837  1.00  3.47           C    
ATOM    194  C   VAL C  15      22.685   8.162   4.507  1.00  6.61           C    
ATOM    195  O   VAL C  15      21.477   8.444   4.480  1.00  5.09           O    
ATOM    196  CB  VAL C  15      24.372   9.378   6.020  1.00  5.15           C    
ATOM    197  CG1 VAL C  15      23.592  10.671   5.759  1.00  6.25           C    
ATOM    198  CG2 VAL C  15      25.012   9.382   7.413  1.00  7.20           C    
ATOM    199 1H10 VAL C  15      25.202   6.931   5.641  1.00  0.00           H    
ATOM    200 2H10 VAL C  15      22.679   8.141   6.611  1.00  0.00           H    
ATOM    201 3H10 VAL C  15      25.183   9.300   5.276  1.00  0.00           H    
ATOM    202 4H10 VAL C  15      22.730  10.766   6.436  1.00  0.00           H    
ATOM    203 5H10 VAL C  15      23.209  10.723   4.730  1.00  0.00           H    
ATOM    204 6H10 VAL C  15      24.242  11.543   5.916  1.00  0.00           H    
ATOM    205 7H10 VAL C  15      25.701  10.233   7.513  1.00  0.00           H    
ATOM    206 8H10 VAL C  15      25.588   8.468   7.612  1.00  0.00           H    
ATOM    207 9H10 VAL C  15      24.247   9.478   8.200  1.00  0.00           H    
ATOM    208  N   AIB C  16      23.396   7.836   3.399  1.00  5.92           N    
ATOM    209  CA  AIB C  16      22.762   7.709   2.078  1.00  4.10           C    
ATOM    210  C   AIB C  16      21.565   6.714   2.190  1.00  2.29           C    
ATOM    211  O   AIB C  16      20.445   6.986   1.735  1.00  5.49           O    
ATOM    212  CB1 AIB C  16      23.778   7.120   1.088  1.00  6.35           C    
ATOM    213  CB2 AIB C  16      22.284   9.076   1.581  1.00  5.46           C    
ATOM    214 0H11 AIB C  16      24.375   7.560   3.502  1.00  0.00           H    
ATOM    215 1H11 AIB C  16      23.289   6.972   0.116  1.00  0.00           H    
ATOM    216 2H11 AIB C  16      24.176   6.159   1.435  1.00  0.00           H    
ATOM    217 3H11 AIB C  16      24.617   7.817   0.947  1.00  0.00           H    
ATOM    218 4H11 AIB C  16      21.657   9.568   2.332  1.00  0.00           H    
ATOM    219 5H11 AIB C  16      21.702   8.961   0.661  1.00  0.00           H    
ATOM    220 6H11 AIB C  16      23.158   9.710   1.381  1.00  0.00           H    
ATOM    221  N   AIB C  17      21.855   5.529   2.784  1.00  4.43           N    
ATOM    222  CA  AIB C  17      20.866   4.451   2.930  1.00  3.49           C    
ATOM    223  C   AIB C  17      19.624   4.984   3.700  1.00  4.36           C    
ATOM    224  O   AIB C  17      18.461   4.699   3.373  1.00  6.88           O    
ATOM    225  CB1 AIB C  17      21.494   3.331   3.779  1.00  9.79           C    
ATOM    226  CB2 AIB C  17      20.463   3.897   1.558  1.00  6.62           C    
ATOM    227 7H11 AIB C  17      22.812   5.343   3.103  1.00  0.00           H    
ATOM    228 8H11 AIB C  17      22.406   2.958   3.292  1.00  0.00           H    
ATOM    229 9H11 AIB C  17      20.782   2.501   3.869  1.00  0.00           H    
ATOM    230 0H12 AIB C  17      21.749   3.685   4.786  1.00  0.00           H    
ATOM    231 1H12 AIB C  17      21.330   3.397   1.106  1.00  0.00           H    
ATOM    232 2H12 AIB C  17      20.137   4.702   0.890  1.00  0.00           H    
ATOM    233 3H12 AIB C  17      19.646   3.172   1.658  1.00  0.00           H    
ATOM    234  N   GLU C  18      19.886   5.739   4.790  1.00  3.49           N    
ATOM    235  CA  GLU C  18      18.803   6.286   5.587  1.00  5.47           C    
ATOM    236  C   GLU C  18      17.913   7.239   4.782  1.00  4.34           C    
ATOM    237  O   GLU C  18      16.689   7.287   5.015  1.00  6.22           O    
ATOM    238  CB  GLU C  18      19.369   6.978   6.842  1.00  5.02           C    
ATOM    239  CG  GLU C  18      18.295   7.543   7.774  1.00 10.35           C    
ATOM    240  CD  GLU C  18      17.758   8.895   7.357  1.00 13.02           C    
ATOM    241  OE1 GLU C  18      18.351   9.722   6.691  1.00 17.61           O    
ATOM    242  OE2 GLU C  18      16.515   9.128   7.868  1.00 13.75           O    
ATOM    243 4H12 GLU C  18      20.848   5.873   5.124  1.00  0.00           H    
ATOM    244 5H12 GLU C  18      18.125   5.471   5.888  1.00  0.00           H    
ATOM    245 6H12 GLU C  18      20.052   7.783   6.532  1.00  0.00           H    
ATOM    246 7H12 GLU C  18      19.971   6.237   7.386  1.00  0.00           H    
ATOM    247 8H12 GLU C  18      18.730   7.700   8.776  1.00  0.00           H    
ATOM    248 9H12 GLU C  18      17.454   6.850   7.917  1.00  0.00           H    
ATOM    249 0H13 GLU C  18      16.287  10.044   7.603  1.00  0.00           H    
ATOM    250  N   GLN C  19      18.507   8.035   3.878  1.00  2.00           N    
ATOM    251  CA  GLN C  19      17.718   8.996   3.133  1.00  3.08           C    
ATOM    252  C   GLN C  19      16.910   8.394   1.971  1.00  4.01           C    
ATOM    253  O   GLN C  19      15.809   8.903   1.688  1.00  7.36           O    
ATOM    254  CB  GLN C  19      18.577  10.169   2.626  1.00  5.24           C    
ATOM    255  CG  GLN C  19      18.818  11.261   3.670  1.00  5.59           C    
ATOM    256  CD  GLN C  19      17.653  12.185   4.025  1.00  3.61           C    
ATOM    257  OE1 GLN C  19      17.816  13.141   4.784  1.00  8.49           O    
ATOM    258  NE2 GLN C  19      16.430  11.913   3.473  1.00  6.26           N    
ATOM    259 1H13 GLN C  19      19.527   8.016   3.777  1.00  0.00           H    
ATOM    260 2H13 GLN C  19      16.944   9.363   3.821  1.00  0.00           H    
ATOM    261 3H13 GLN C  19      18.094  10.597   1.733  1.00  0.00           H    
ATOM    262 4H13 GLN C  19      19.536   9.764   2.271  1.00  0.00           H    
ATOM    263 5H13 GLN C  19      19.629  11.927   3.338  1.00  0.00           H    
ATOM    264 6H13 GLN C  19      19.163  10.824   4.620  1.00  0.00           H    
ATOM    265 7H13 GLN C  19      16.240  11.145   2.832  1.00  0.00           H    
ATOM    266 8H13 GLN C  19      15.669  12.542   3.709  1.00  0.00           H    
ATOM    267  N   PHL C  20      17.472   7.369   1.303  1.00  3.52           N    
ATOM    268  CA  PHL C  20      16.807   6.698   0.196  1.00  2.36           C    
ATOM    269  C   PHL C  20      17.067   5.186   0.252  1.00  5.10           C    
ATOM    270  O   PHL C  20      16.524   4.572   1.407  1.00  8.07           O    
ATOM    271  CB  PHL C  20      17.149   7.331  -1.180  1.00  6.86           C    
ATOM    272  CG  PHL C  20      18.615   7.480  -1.499  1.00  5.23           C    
ATOM    273  CD1 PHL C  20      19.390   6.404  -1.959  1.00  6.40           C    
ATOM    274  CD2 PHL C  20      19.242   8.725  -1.346  1.00  3.99           C    
ATOM    275  CE1 PHL C  20      20.744   6.565  -2.253  1.00 11.32           C    
ATOM    276  CE2 PHL C  20      20.591   8.897  -1.658  1.00  9.32           C    
ATOM    277  CZ  PHL C  20      21.349   7.816  -2.109  1.00  5.18           C    
ATOM    278 9H13 PHL C  20      18.424   7.081   1.557  1.00  0.00           H    
ATOM    279 0H14 PHL C  20      15.732   6.859   0.353  1.00  0.00           H    
ATOM    280 1H14 PHL C  20      18.149   4.983   0.169  1.00  0.00           H    
ATOM    281 2H14 PHL C  20      16.583   4.727  -0.627  1.00  0.00           H    
ATOM    282 3H14 PHL C  20      17.199   4.610   2.125  1.00  0.00           H    
ATOM    283 4H14 PHL C  20      16.675   8.323  -1.206  1.00  0.00           H    
ATOM    284 5H14 PHL C  20      16.653   6.724  -1.956  1.00  0.00           H    
ATOM    285 6H14 PHL C  20      18.925   5.426  -2.104  1.00  0.00           H    
ATOM    286 7H14 PHL C  20      18.655   9.574  -0.989  1.00  0.00           H    
ATOM    287 8H14 PHL C  20      21.325   5.714  -2.611  1.00  0.00           H    
ATOM    288 9H14 PHL C  20      21.050   9.882  -1.553  1.00  0.00           H    
ATOM    289 0H15 PHL C  20      22.404   7.948  -2.356  1.00  0.00           H    
TER
